# Supplementary material
Source: MDPI journal article supplement (https://www.mdpi.com/2073-4344/13/9/1302)
Supplement: s1 [file s1]

Supplementary Materials

# The role of carbon nanotube deposit in catalytic activity of FeO<sub>x</sub>-based PECVD thin films tested in RWGS reaction

Bartosz Panek <sup>1</sup>, Hanna Kierzkowska-Pawlak <sup>1</sup>, Paweł Uznański <sup>2</sup>, Stefan Nagy <sup>3</sup> Veronika Nagy-Trembošová <sup>3</sup> and Jacek Tyczkowski <sup>1,\*</sup>

<sup>1</sup> Department of Molecular Engineering, Faculty of Process and Environmental Engineering, Lodz University of Technology, Wolczanska 213, 93-005 Lodz, Poland;

<sup>2</sup> Centre of Molecular and Macromolecular Studies, Polish Academy of Sciences, Sienkiewicza 112, 90-363 Lodz, Poland;

<sup>3</sup> Institute of Materials and Machine Mechanics, Slovak Academy of Sciences, Dúbravská cesta 9, 845-11 Bratislava, Slovakia

\*Correspondence: jacek.tyczkowski@p.lodz.pl

## Scheme 1. X-ray diffraction (XRD)

### 0.1FeO<sub>x</sub>

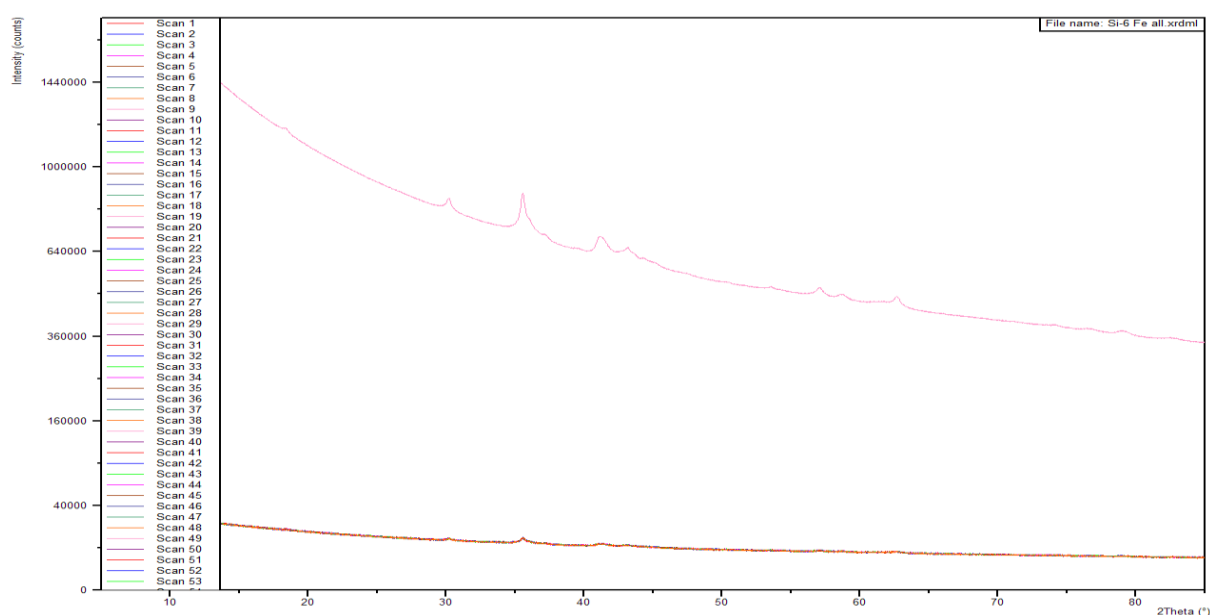

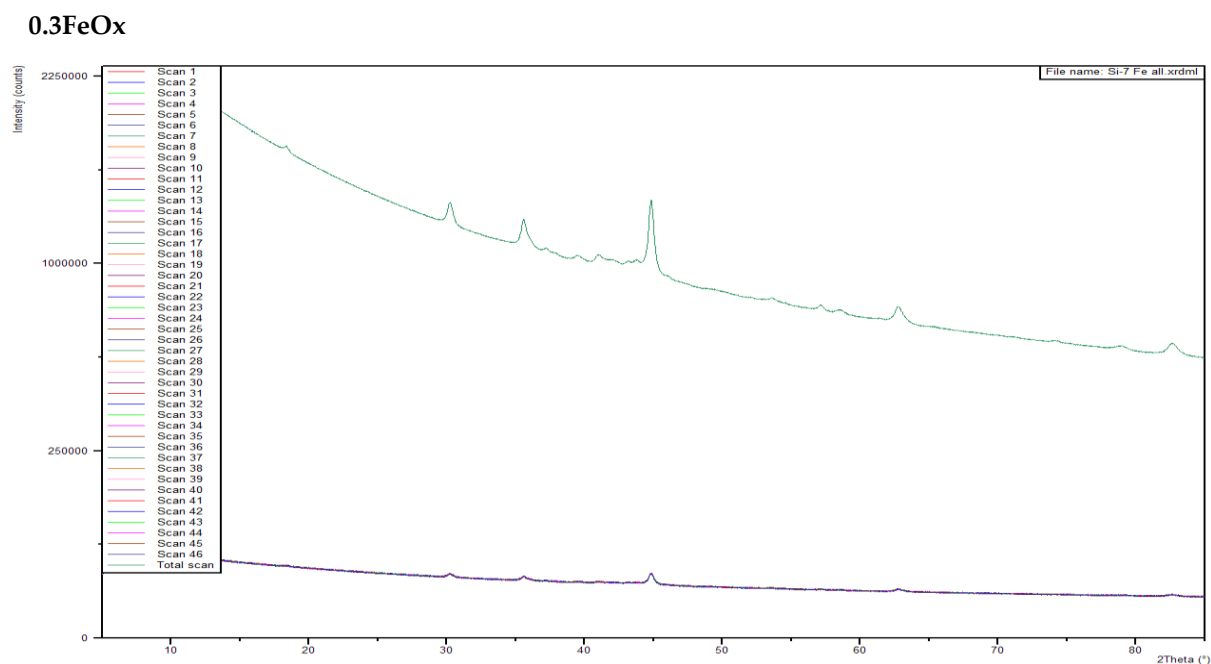

**Figure S1.** Raw XRD patterns for 0.1FeOx and 0.3FeOx films indicate, in both cases, the possible presence of an amorphous fraction containing nanocrystalline structures. These structures are analyzed in the article.

## Scheme 2. RWGS reaction – thermodynamic analysis.

In this study, we conducted a thermodynamic analysis of the reverse water gas shift reaction ( $\text{CO}_2 + \text{H}_2 \leftrightarrow \text{CO} + \text{H}_2\text{O}$ ) to determine the equilibrium  $\text{CO}_2$  conversion ( $X_{\text{CO}_2}$ ). The analysis employed the total Gibbs free energy minimization method, which allows for the calculation of equilibrium composition based on the initial reactants' composition and the operating conditions.

For this calculation, two reaction substrates,  $\text{CO}_2$  and  $\text{H}_2$ , were fed to the reactor in a ratio of 1:4. In modeling the RWGS reaction, the following reagents were considered:  $\text{CO}_2$ ,  $\text{H}_2$ ,  $\text{H}_2\text{O}$ , and  $\text{CO}$ . The equilibrium composition of the outlet stream was determined under a constant pressure of 0.1 MPa while varying the temperature within the range of 423 to 773 K. The results of the analysis are presented in Figure S2, showing the mole fractions of the components as functions of temperature and the calculated equilibrium  $\text{CO}_2$  conversion.

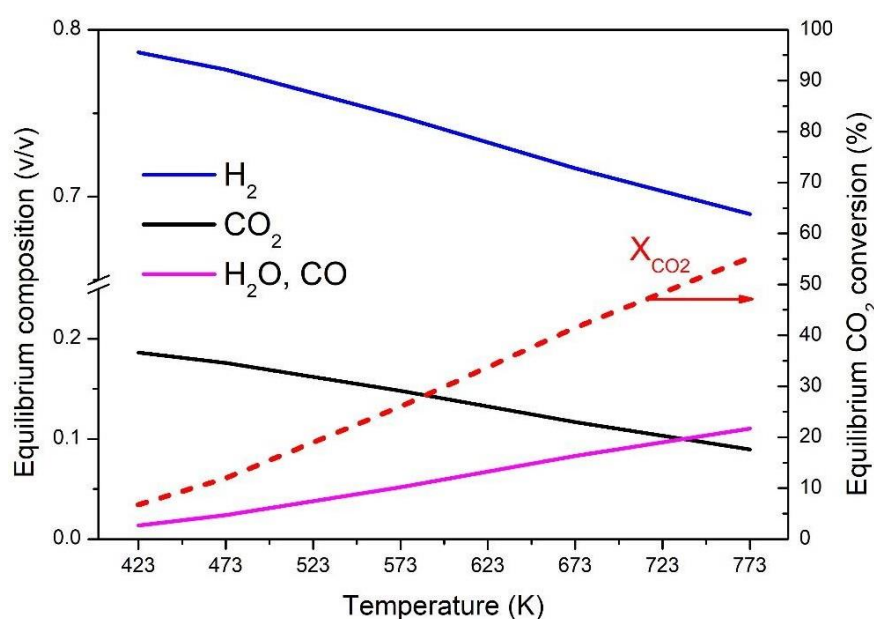

**Figure S2.** The equilibrium composition and  $\text{CO}_2$  conversion as a function of temperature for RWGS reaction (0.1 MPa;  $\text{H}_2/\text{CO}_2=4$ ).

As can be seen from the calculated data, the production of  $\text{CO}$  is favored at high temperatures due to the endothermic nature of the RWGS reaction. At 673 K, which is the highest reaction temperature applied in catalytic tests, the equilibrium conversion is 41.5%.

**Scheme 3.** Calculation of composition of core–shell iron nanoparticle.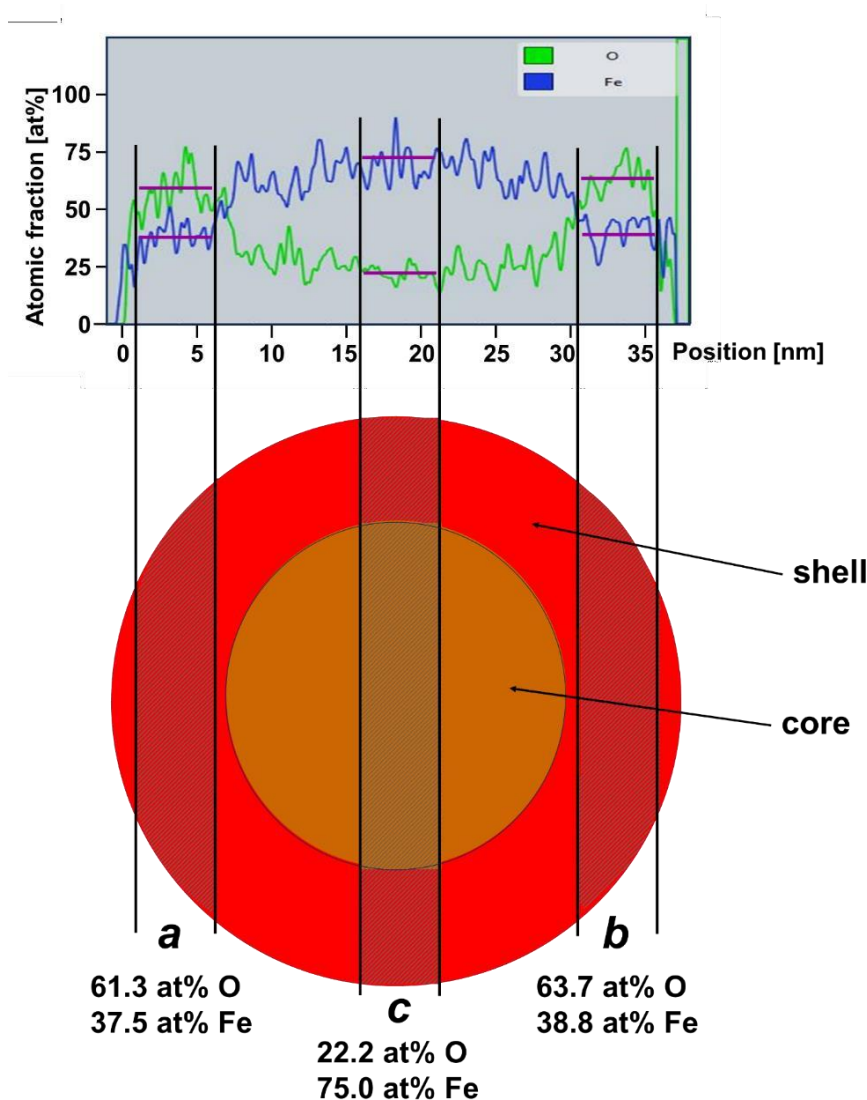**Figure S3.** Nano-XRD results: atomic intensity profile of iron and oxygen along the diameter of the nanoparticle and its model with analyzed zones.

The nano-EDX measurements presented in the paper's Figures 7(a-e) reveal that the nanoparticles accompanying the carbon nanotubes are composed of an iron-rich core and an oxygen-rich shell. To precisely determine the composition of the shell and core, an analysis was performed based on the atomic intensity profiles of iron and oxygen across the nanoparticle's diameter (Figure S3). The examined area was 5 nm x 10 nm, which allowed us to measure only the shell volume (zones *a* and *b*) as well as the core volume plus two fragments of the shell volume (zone *c*). The average ratio of oxygen and iron in the shell, approximately 1.6, aligns well with the O/Fe ratio in iron oxide  $\text{Fe}_2\text{O}_3$ , theoretically 1.5. This suggests that the shell is composed of  $\text{Fe}_2\text{O}_3$ .

Regarding zone *c* and assuming the shell consists of  $\text{Fe}_2\text{O}_3$ , the oxygen content determined there (22.2 at%) would correspond to 14.8 at% of iron within two fragments of the  $\text{Fe}_2\text{O}_3$  shell (top and bottom). In this case, the iron contribution in the core of the studied nanoparticle is  $75.0 - 14.8 = 60.2$  at%, which constitutes 80.3 % of all iron present in zone *c*.

By assuming that the core and shell consist of pure iron and  $\text{Fe}_2\text{O}_3$ , respectively, the absolute number of moles of Fe within the core and shell in zone *c* can be calculated. The diameter of the core in the investigated nanoparticle is around 23 nm, and the thickness of the shell is about 6 nm. The volumes tested in zone *c* are therefore as follows:

- for the shell (top and bottom):  $2 \times 6 \text{ nm} \times 5 \text{ nm} \times 10 \text{ nm} = 600 \text{ nm}^3$ .
- for the core:  $23 \text{ nm} \times 5 \text{ nm} \times 10 \text{ nm} = 1150 \text{ nm}^3$ .

Using the density of iron ( $7.66 \text{ g/cm}^3$ ), the density of  $\text{Fe}_2\text{O}_3$  ( $5.34 \text{ g/cm}^3$ ), the atomic weight of iron ( $56 \text{ g/mol}$ ), and the molecular weight of  $\text{Fe}_2\text{O}_3$  ( $160 \text{ g/mol}$ ), calculations were performed to find that the analyzed core volume contains  $1.57 \times 10^{-19} \text{ mol}$  of Fe, while both regions of the shell contain  $0.4 \times 10^{-19} \text{ mol}$  of Fe. This calculation demonstrates that the core comprises 79.7 % of the iron present in zone *c*, closely matching the nano-EDX measurements (80.3 %), thereby confirming the hypothesis that the core of the nanoparticle is composed of pure iron.
